# Supplementary material for: Genetic comparisons of fall armyworm populations from 11 countries spanning sub-Saharan Africa provide insights into strain composition and migratory behaviors
Source: PubMed Central journal article supplement (PMC6549444; doi:10.1038/s41598-019-44744-9), 2019-06-05
Supplement: 41598_2019_44744_MOESM1_ESM.pdf [file 41598_2019_44744_MOESM1_ESM.pdf]

## Supplementary Information

Genetic comparisons of fall armyworm populations from 11 countries spanning sub-Saharan Africa provide insights into strain composition and migratory behaviors.

Rodney N. Nagoshi<sup>1\*</sup>, Georg Goergen<sup>2</sup>, Hannalene Du Plessis<sup>3</sup>, Johnnie van den Berg<sup>3</sup>, and Robert L. Meagher<sup>1</sup>

<sup>1</sup>Center for Medical, Agricultural and Veterinary Entomology, United States Department of Agriculture-Agricultural Research Service, Gainesville, Florida, United States of America.

<sup>2</sup>International Institute of Tropical Agriculture (IITA), Cotonou, Benin

<sup>3</sup>Unit for Environmental Sciences and Management, North-West University, Potchefstroom, South Africa

\* Corresponding author

E-mail: [rodney.nagoshi@ars.usda.gov](mailto:rodney.nagoshi@ars.usda.gov)

## Supplementary Figure legends

Supplementary Figure S1. Map of collection sites in Africa described in Table 1.

Supplementary Figure S2. Description of the COIB polymorphisms and the haplotypes observed in African fall armyworm. The consensus Western Hemisphere *COI-CS* (WHCOI-CS) and *COI-RS* (WHCOI-RS) sequences are in dark bold. The six COIB haplotypes observed in Africa are listed with two in the *COI-CS* and four in the *COI-RS* categories. Strain-specific polymorphisms are indicated by bold lettering. Differences within strain categories are denoted by dark bold. Sites polymorphic in the consensus are indicated by the IUPAC symbol R, which indicates a G or A alternative. Asterisk identifies site used for strain identity.

Supplementary Figure S3. Descriptions of the *Tpi* gene segments used in the fall armyworm analysis. Numbered locations indicate relevant polymorphic sites. A, haplotype sequences in the TpiE4 segment are shown with WHTpiR and WHTpiC the consensus sequences for the strain-specific *Tpi* haplotypes derived from Western Hemisphere data. Asterisks identify strain-specific polymorphic sites defined by Western Hemisphere populations. Note that site 165 is strain-specific in the Western Hemisphere but not in Africa. Dark and bold lettering indicate differences from the reference sequences. B, the six TpiI4 haplotypes found in Africa. Letters in dark bold identify polymorphisms. Site 131 was associated with consistently poor sequence quality and so was assumed to be the consensus G for all specimens. Dark triangle indicates insertion site in TpiI4Ca1b of a 200-bp insertion.

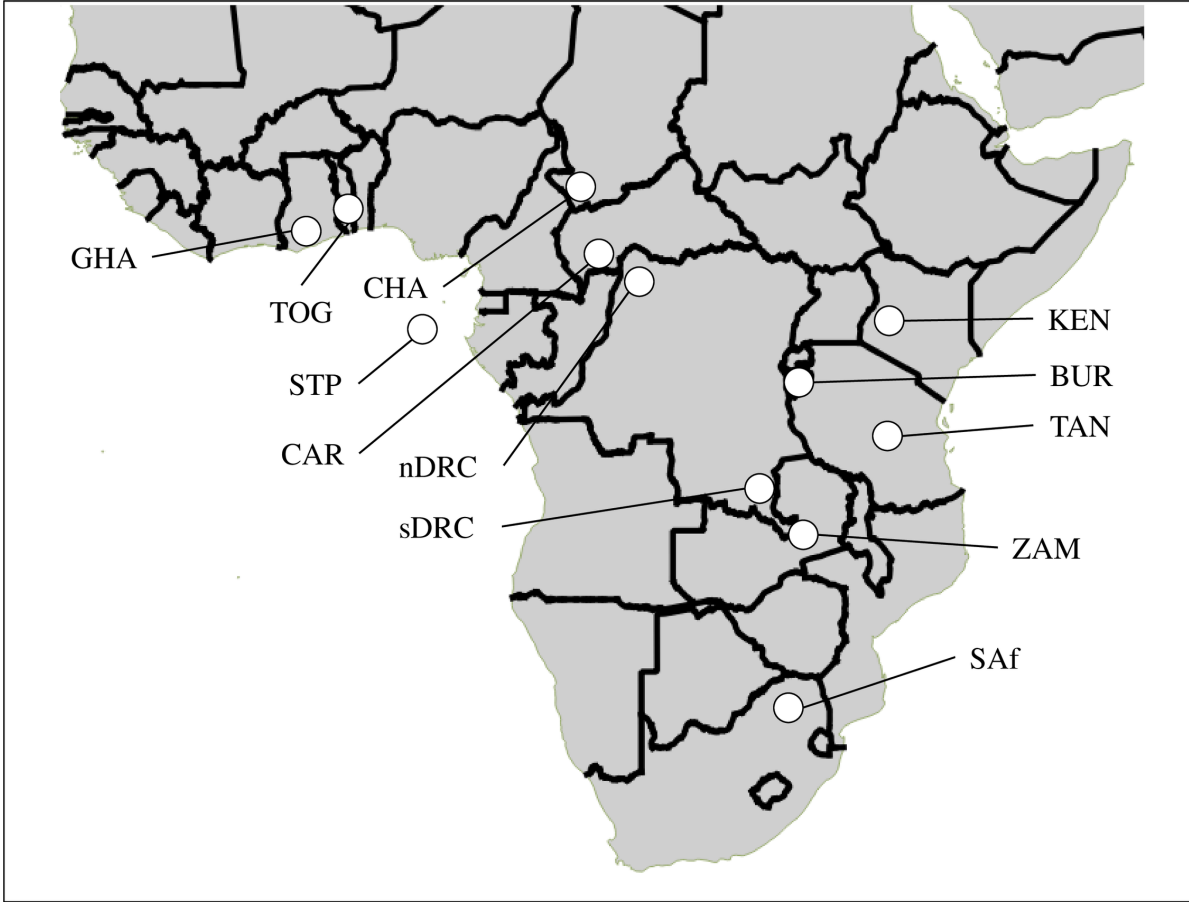

Supplementary Figure S1

|                 |          |          |          |          |
|-----------------|----------|----------|----------|----------|
|                 | 1125     |          | 1164*    | 1176     |
|                 |          |          |          |          |
| <b>WHCOI-CS</b> | <b>C</b> | <b>A</b> | <b>T</b> | <b>T</b> |
| <i>COI-CSa1</i> | C        | A        | T        | T        |
| <i>COI-CSa2</i> | C        | A        | T        | T        |
| <b>WHCOI-RS</b> | <b>C</b> | <b>A</b> | <b>T</b> | <b>T</b> |
| <i>COI-RSa1</i> | C        | A        | T        | T        |
| <i>COI-RSa2</i> | C        | A        | T        | T        |
| <i>COI-RSa3</i> | C        | A        | T        | T        |
| <i>COI-RSa4</i> | C        | A        | T        | T        |

  

|                 |          |          |          |
|-----------------|----------|----------|----------|
|                 | 1182     | 1197     | 1216     |
|                 |          |          |          |
| <b>WHCOI-CS</b> | <b>T</b> | <b>G</b> | <b>A</b> |
| <i>COI-CSa1</i> | T        | G        | A        |
| <i>COI-CSa2</i> | T        | G        | A        |
| <b>WHCOI-RS</b> | <b>T</b> | <b>G</b> | <b>A</b> |
| <i>COI-RSa1</i> | T        | G        | A        |
| <i>COI-RSa2</i> | T        | G        | A        |
| <i>COI-RSa3</i> | T        | G        | A        |
| <i>COI-RSa4</i> | T        | G        | A        |

  

|                 |          |
|-----------------|----------|
|                 | 1287     |
|                 |          |
| <b>WHCOI-CS</b> | <b>A</b> |
| <i>COI-CSa1</i> | A        |
| <i>COI-CSa2</i> | A        |
| <b>WHCOI-RS</b> | <b>A</b> |
| <i>COI-RSa1</i> | A        |
| <i>COI-RSa2</i> | A        |
| <i>COI-RSa3</i> | A        |
| <i>COI-RSa4</i> | A        |

Supplementary Figure S2

A. TpiE4

|         |                                                                                                                                   |     |      |      |     |      |     |     |
|---------|-----------------------------------------------------------------------------------------------------------------------------------|-----|------|------|-----|------|-----|-----|
|         | 129                                                                                                                               | 144 | 165* | 168* | 180 | 183* | 192 | 198 |
|         |                                                                                                                                   |     | \    | /    | \   | /    |     |     |
| WHTpiR: | TGGCAGCAACTGGGACAAGGTCGTACTAGCTTATGAACCTGTCTGGGCTATTGGCAGCTGGAAAGACYGCCACYCCA                                                     |     |      |      |     |      |     |     |
| TpiRa1: | TGC <b>T</b> AGCAACTGGGACA <b>A</b> AGTCGTACTAGCTTATGAAC <b>C</b> GTCTGGGCTATTGG <b>G</b> ACTGGAAAGAC <b>C</b> GCCAC <b>C</b> CCA |     |      |      |     |      |     |     |
| WHTpiC: | TGGCAGCAACTGGGACAAGGTCGTACTAGCTTATGAACCCGTTTGGGCTATTGGCACC <b>G</b> GAAAGACYGCCACYCCA                                             |     |      |      |     |      |     |     |
| TpiCa1: | TGGCAGCAACTGGGACAAGGTCGTACTAGCTTATGAACCCGTTTGGGCTATTGGCACC <b>G</b> GAAAGAC <b>C</b> GCCAC <b>C</b> CCA                           |     |      |      |     |      |     |     |
| TpiCa2: | TGGCAGCAACTGGGACAAGGTCGTACTAGCTTATGAACCCGTTTGGGCTATTGGCACC <b>G</b> GAAAGAC <b>T</b> GCCAC <b>T</b> CCA                           |     |      |      |     |      |     |     |

B. TpiI4

|         |                                                                                                                                                             |    |    |    |    |    |    |    |    |    |    |    |
|---------|-------------------------------------------------------------------------------------------------------------------------------------------------------------|----|----|----|----|----|----|----|----|----|----|----|
|         | 28                                                                                                                                                          | 29 | 31 | 38 | 53 | 55 | 58 | 70 | 77 | 80 | 84 | 87 |
|         | \                                                                                                                                                           | /  | /  |    | \  | /  |    |    |    |    |    |    |
| TpiRa1a | TTAATTTGTTTTATA <b>A</b> AAATGCAGGATA <b>A</b> AAATG--CATGCA <b>A</b> ATC <b>F</b> TTATTGGTATTA <b>A</b> AGTTT <b>A</b> CTTCCAT <b>A</b> ATCTTG             |    |    |    |    |    |    |    |    |    |    |    |
| TpiCa1a | TTAATTTGTTTTAT--AAAT <b>AA</b> ACGATA <b>AA</b> CAAT <b>G</b> ATACATGC <b>AA</b> ATC <b>T</b> TGATTGGTATTA <b>AA</b> AGTTT <b>A</b> CTT <b>A</b> CATGATCTTG |    |    |    |    |    |    |    |    |    |    |    |
| TpiCa1b | TTAATTTGTTTTAT--AAAT <b>AA</b> ACGATA <b>AA</b> CAAT <b>G</b> ATACATGC <b>AA</b> ATC <b>T</b> TGATTGGTATTA <b>AA</b> AGTTT <b>A</b> CTT <b>A</b> CATGATCTTG |    |    |    |    |    |    |    |    |    |    |    |
| TpiCa2a | TTAATTTGTTTTAT--AAAT <b>AA</b> AGGATA <b>AA</b> AAAT <b>G</b> ATACATGC <b>AA</b> TT <b>A</b> TTTATTGGTATTA <b>AA</b> CAGTTT <b>A</b> TT <b>A</b> CATGATTTTG |    |    |    |    |    |    |    |    |    |    |    |
| TpiCa2b | TTAATTTGTTTTAT--AAAT <b>AA</b> AGGATA <b>AA</b> AAAT <b>G</b> ATACATGC <b>AA</b> TT <b>A</b> TTTATTGGTATTA <b>AA</b> CAGTTT <b>A</b> TT <b>A</b> CATGATTTTG |    |    |    |    |    |    |    |    |    |    |    |
| TpiCa2C | TTAATTTGTTTTAT--AAAT <b>AA</b> AGGATA <b>AA</b> AAAT <b>G</b> ATACATGC <b>AA</b> TT <b>A</b> TTTATTGGTATTA <b>AA</b> CAGTTT <b>A</b> TT <b>A</b> CATGATCTTG |    |    |    |    |    |    |    |    |    |    |    |

  

|         |                                                                                                                                                   |     |     |     |     |     |     |
|---------|---------------------------------------------------------------------------------------------------------------------------------------------------|-----|-----|-----|-----|-----|-----|
|         | 96                                                                                                                                                | 131 | 136 | 148 | 155 | 167 | 171 |
|         |                                                                                                                                                   |     |     |     |     |     |     |
| TpiRa1a | AACTGTGCTTATCTAGTAAATAGTGT <b>T</b> TAGAATTTAATCAGAA <b>T</b> TGGTTTCAGTAAT <b>C</b> AGTATG <b>C</b> TATTTAA <b>A</b> ACC <b>T</b> ATAG           |     |     |     |     |     |     |
| TpiCa1a | AACTGTGCTTATCTAGTAAATAGTGT <b>T</b> TAGAATTTAATCAGAA <b>T</b> TGGTTTCAGTAAT <b>C</b> AGTATG <b>T</b> TATTTAA <b>A</b> ACC <b>T</b> ATAGG          |     |     |     |     |     |     |
| TpiCa1b | AACTGTGCTTATCTAGTAAATAGTGT <b>T</b> TAGAATTTAATCAGAA <b>T</b> TGGTTTCAGTAAT <b>C</b> AGTATG <b>T</b> TATTTAA <b>A</b> ACC <b>T</b> ATAGG          |     |     |     |     |     |     |
| TpiCa2a | AACTG <b>C</b> GCTTATCTAGTAAATAGTGT <b>T</b> TAGAATTTAATCAGAA <b>T</b> TGGTTTCAGTAAT <b>A</b> AGTATG <b>T</b> TATTTAA <b>A</b> ACC <b>T</b> ATAGG |     |     |     |     |     |     |
| TpiCa2b | AACTG <b>C</b> GCTTATCTAGTAAATAGTGT <b>T</b> TAGAATTTAATCAGAA <b>T</b> TGGTTTCAGTAAT <b>C</b> AGTATG <b>T</b> TATTTAA <b>A</b> ACC <b>T</b> ATAGG |     |     |     |     |     |     |
| TpiCa2C | AACTGTGCTTATCTAGTAAATAGTGT <b>T</b> TAGAATTTAATCAGAA <b>T</b> TGGTTTCAGTAAT <b>C</b> AGTATG <b>T</b> TATTTAA <b>A</b> ACC <b>T</b> ATAGG          |     |     |     |     |     |     |

TpiI4Ca1b insertion (▼): TCTATTATATA**A**AAATAAGTCGGGTTTTCCTTCCTGACGCTATA**A**ACTCCAGAA**T**GCACGAACCGATT  
TCCACGGTTT**T**GCATCCGTTGGAAAGG**T**CTCGGGCTCCGTGAGGTTTATAGCAAAGAAA**T**TCCGGA  
TTAA**A**AAAA**A**AGCACGAGGACACTGAA**A**ATCATTGGTGGCGAAACGGG**T**TCCCGGGTTT**T**GCATG

## Supplementary Figure S3
